# Supplementary material for: Expression of two non-mutated genetic elements is sufficient to stimulate oncogenic transformation of human mammary epithelial cells
Source: PubMed Central journal article supplement (PMC6242831; doi:10.1038/s41419-018-1177-6), 2018-11-19

# Supplementary information 1

## A. Soft agar colony formation

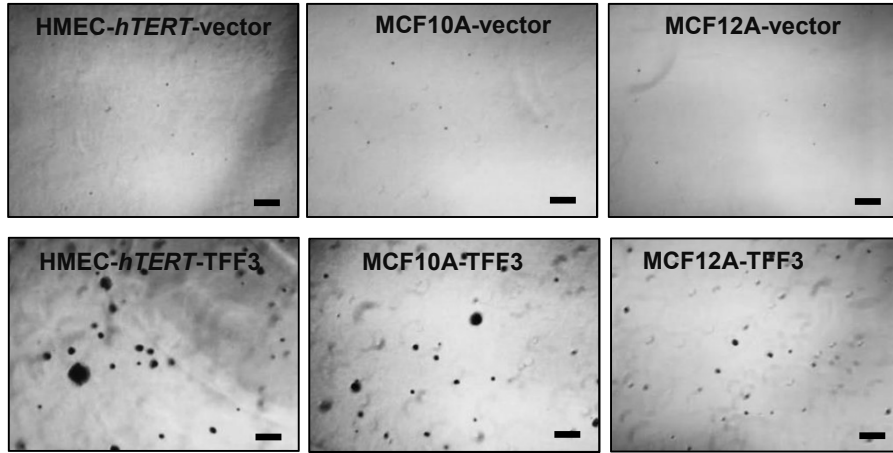

## B. Suspension culture

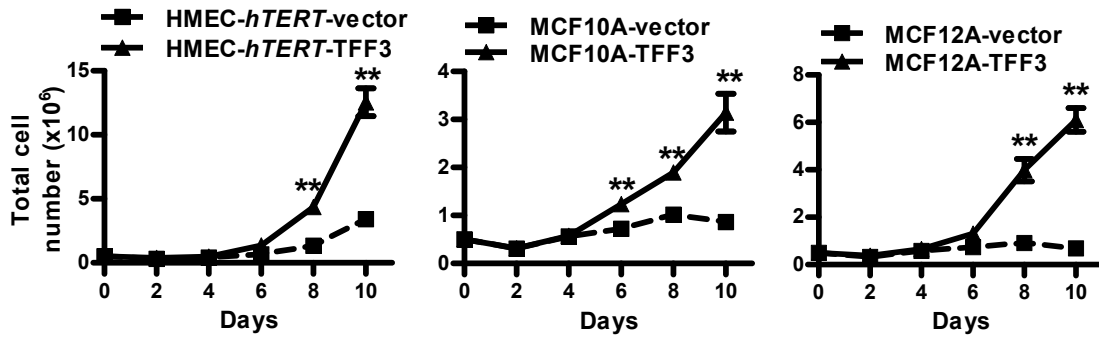

## C. Cell viability

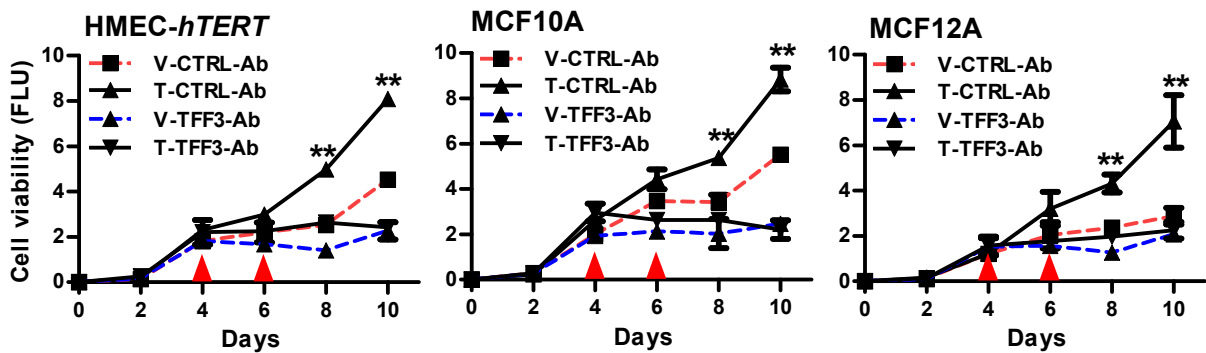

Supplement: 41419_2018_1177_MOESM1_ESM.pdf [file 41419_2018_1177_MOESM1_ESM.pdf]
